# Supplementary material
Source: Springer Nature journal article supplement (https://www.springermedizin.de/resource/supplementary/12958_2012_1040_MOESM1_ESM.pdf/9566436)
Supplement: MOESM1 [file 9566436]

## Enrollment

Assessed for eligibility (n=490)

Excluded (n=186)

- ◆ Not meeting inclusion criteria (n=50)
- ◆ Declined to participate (n=103)
- ◆ Other reasons (n=33)

Randomized (n=304)

## Allocation

Allocated to intervention "Clomiphene"  
(n=148)

- ◆ Received allocated intervention (n=145)
- ◆ Did not receive allocated intervention  
(personal reasons unrelated to the  
treatment) (n=3)

Allocated to intervention "High dose rFSH"  
(n=156)

- ◆ Received allocated intervention (n=146)
- ◆ Did not receive allocated intervention  
(personal reasons unrelated to the  
treatment) (n=10)

## Follow-Up

Lost to follow-up (n=0)  
Discontinued intervention (for inappropriate  
response) (n=21)

Lost to follow-up (n=0)  
Discontinued intervention (for inappropriate  
response) (n=21)

## Analysis

Analysed (n=124)

- ◆ Excluded from analysis (n=0)

Analysed (n=125)

- ◆ Excluded from analysis (n=0)
